# Supplementary material for: Perturbing the properties of layered double hydroxides by continuous coprecipitation with short residence time
Source: Royal Society of Chemistry journal article supplement (doi:10.1039/c0jm00088d), 2010-01-01
Supplement: c0jm00088d.pdf [file c0jm00088d.pdf]

**Perturbing the Properties of Layered Double Hydroxides by Continuous Coprecipitation  
with Short Residence Time**

Sònia Abelló, Sharon Mitchell, Marta Santiago, Georgiana Stoica and Javier Pérez-Ramírez\*

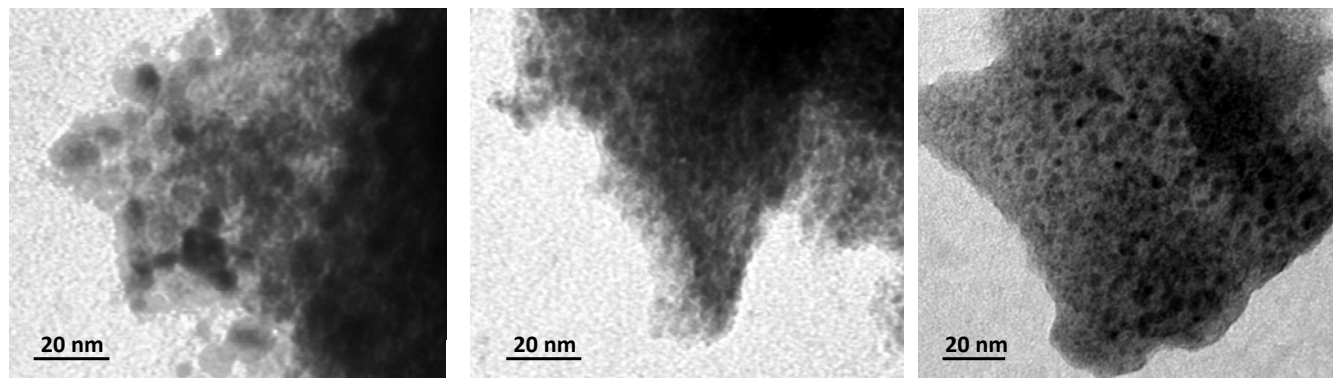

**Fig. SI1** Additional TEM micrographs of Ni-Al hydrotalcite particles prepared by ILDP method with  $\tau = 1$  s, clearly showing the tightly aggregated nature of the materials obtained.

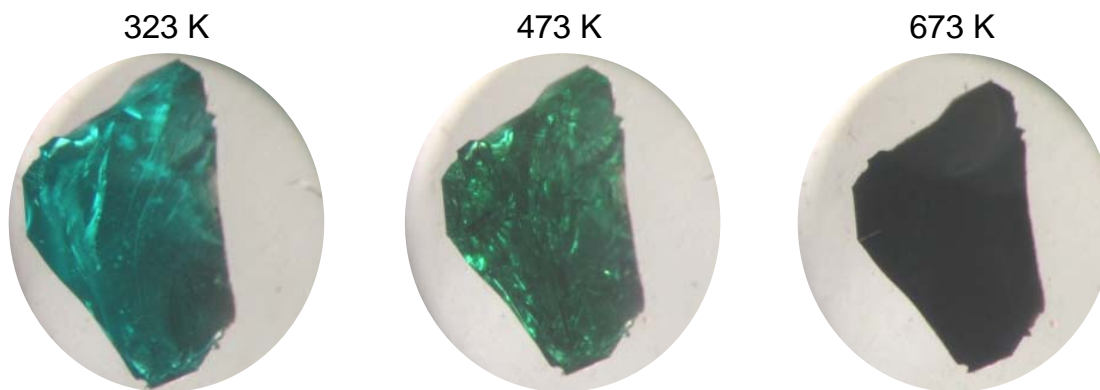

**Fig. SI2** Stereomicroscopic images of Ni-Al hydrotalcite with  $\tau = 1$  s upon *in situ* heating in air at different temperatures.
